# Supplementary material for: Atrial Electrical Remodeling in Mice With Cardiac‐Specific Overexpression of Angiotensin II Type 1 Receptor
Source: PubMed Central journal article supplement — J Am Heart Assoc. 2022 Apr 18;11(8):e023974. doi: 10.1161/JAHA.121.023974 (PMC9238446; doi:10.1161/jaha.121.023974), 2022-04-18
Supplement: JAH3-11-e023974-s001.pdf [file JAH3-11-e023974-s001.pdf]

# **SUPPLEMENTAL MATERIAL**

Figure S1. Stain-free blots used to normalize  $\text{Na}_v1.5$  and Cx40 expression.

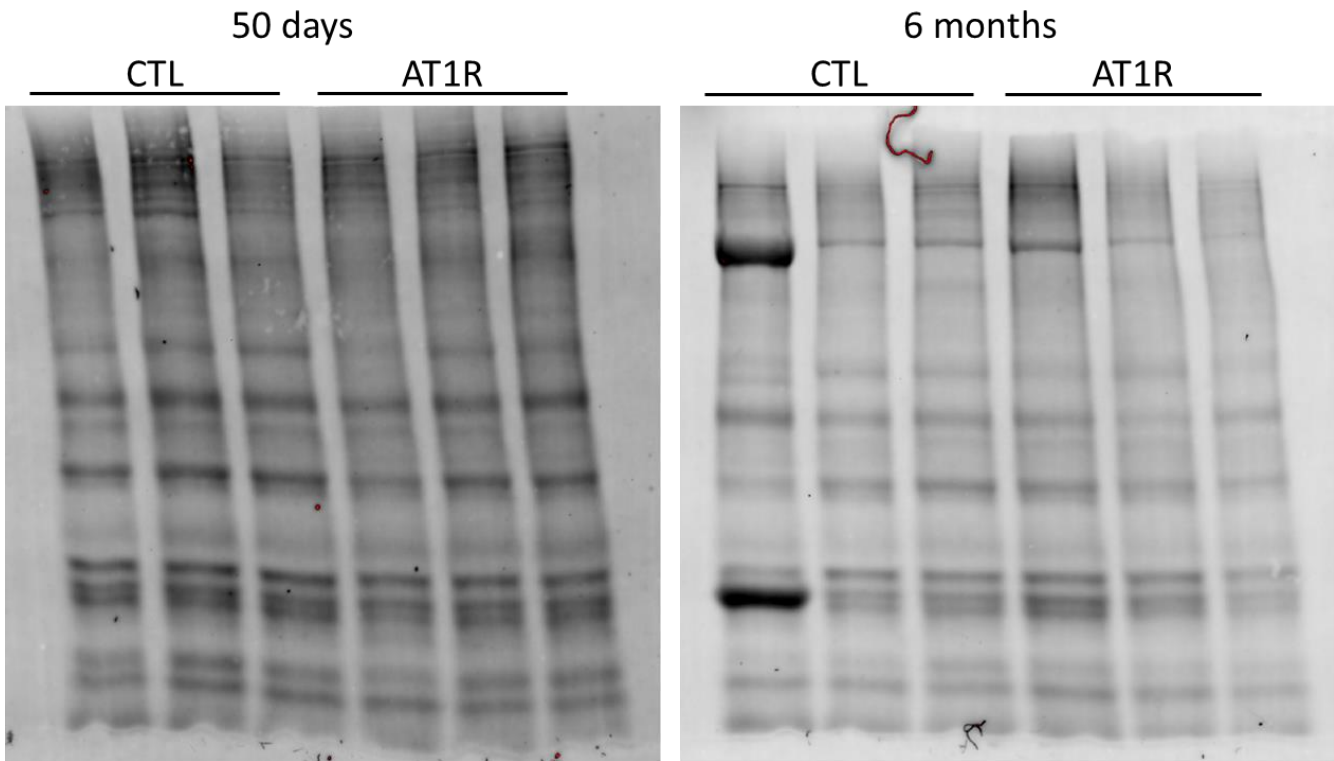

Each well was loaded with 30  $\mu\text{g}$  of sarcolemmal proteins (from 50 days and 6 months and visualised using Stain-free technology on a ChemiDoc apparatus. Quantification of all bands visible in each well were used to normalize the expression of the proteins of interest (Figure 3 for  $\text{Na}_v1.5$  and Figure 6 for Cx40).

**Figure S2. Stain-free blots used to normalize Cx43 expression.**

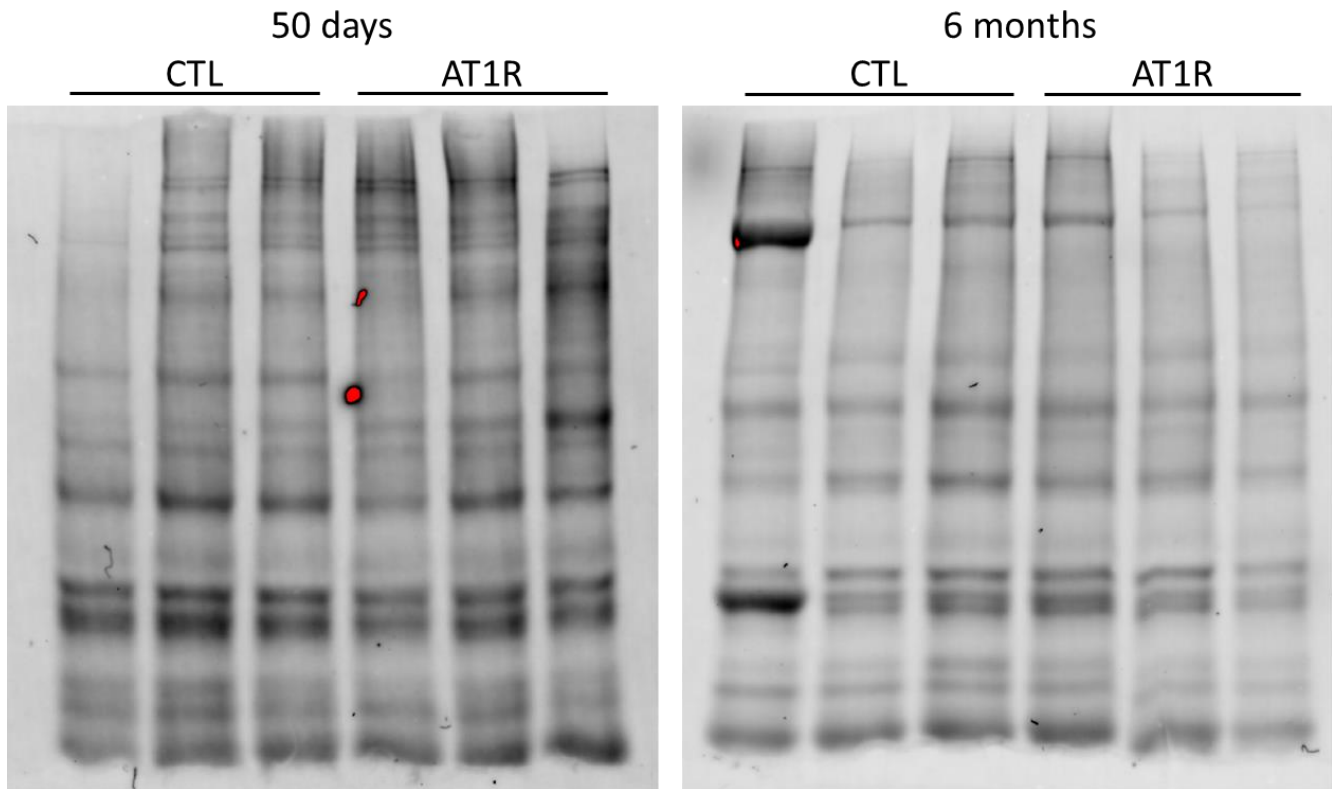

Sarcolemmal proteins (30  $\mu\text{g}/\text{well}$ ) isolated from 50 days (left) and 6 months (right) were visualised using Stain-free technology on a ChemiDoc apparatus. Quantification of all visible bands in each well was used to normalize expression the protein of interest, Cx43 (Figure 6).

**Figure S3. Stain-free blots used to normalize PKC $\alpha$  expression.**

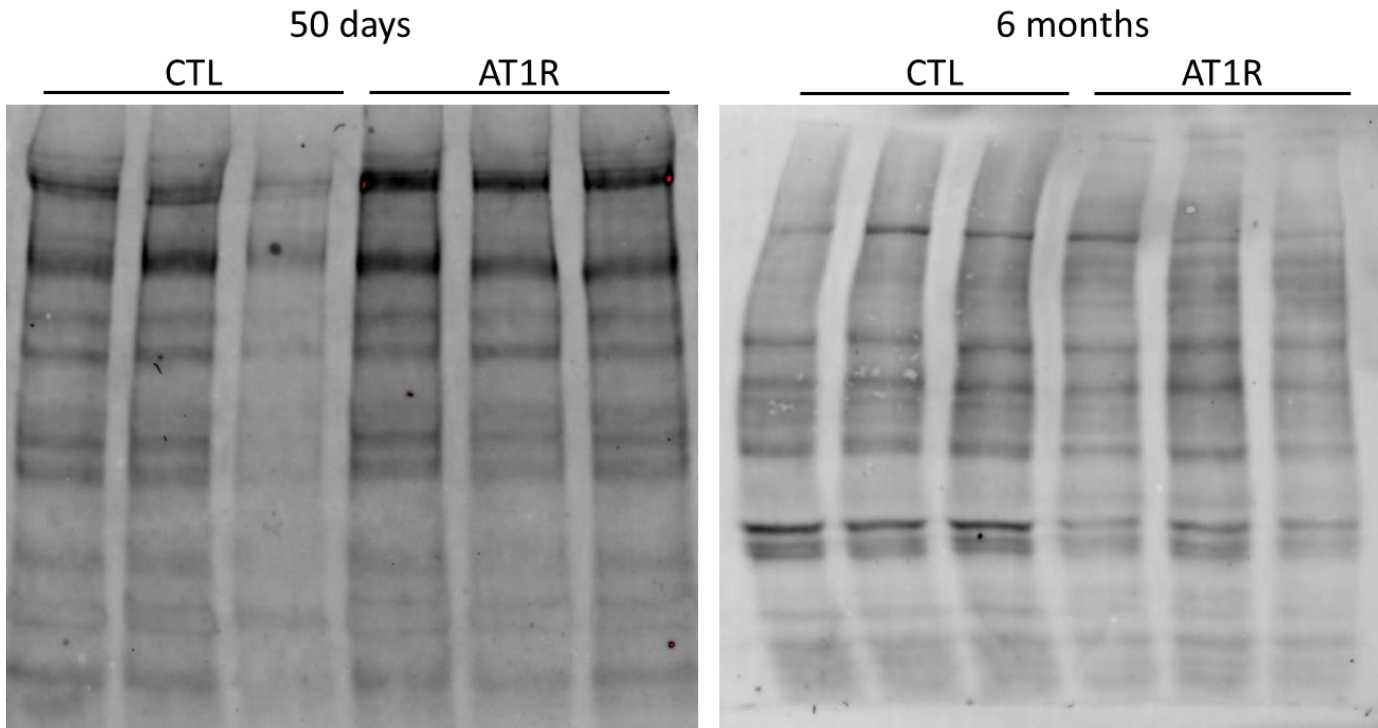

At 50 days (left), 10  $\mu$ g of sarcolemmal proteins isolated for left atria were loaded in each well and visualized using Stain-free technology on a ChemiDoc apparatus. At 6 months, all volume of the protein extracts were loaded on the gel. Quantification of all bands visible in each well were used to normalize the expression of the protein of interest, PKC $\alpha$  (Figure 3).
